# Supplementary material
Source: HighWire-hosted journal article supplement (https://bmjopen.bmj.com/content/12/8/e049644)
Supplement: inline-supplementary-material-3 [file inline-supplementary-material-3.pdf]

## Supplementary tables

Table S1 Average hourly wage by occupation in Pakistan and Bangladesh

| Occupation                                   | Average hourly wage (PPP US\$) <sup>1-3</sup> |        |       |          |        |       |
|----------------------------------------------|-----------------------------------------------|--------|-------|----------|--------|-------|
|                                              | Bangladesh                                    |        |       | Pakistan |        |       |
|                                              | Male                                          | Female | Total | Male     | Female | Total |
| Managers                                     | 5.68                                          | 5.13   | 5.62  | 9.67     | 0.84   | 9.57  |
| Professionals                                | 4.25                                          | 3.93   | 4.13  | 6.06     | 3.84   | 5.30  |
| Technicians and Associate Professionals      | 3.35                                          | 3.21   | 3.32  | 4.69     | 3.27   | 4.50  |
| Clerical support workers                     | 2.56                                          | 2.33   | 2.53  | 4.69     | 3.16   | 4.66  |
| Service and Sales workers                    | 1.88                                          | 1.76   | 1.86  | 2.85     | 2.37   | 2.83  |
| Skilled Agricultural, forestry and fisheries | 1.50                                          | 1.24   | 1.46  | 3.03     | 0.98   | 2.96  |
| Craft and Related Trades workers             | 1.69                                          | 1.55   | 1.65  | 3.00     | 0.89   | 2.67  |
| Plant and Machine Operators, and Assembler   | 1.91                                          | 1.77   | 1.89  | 2.96     | 1.95   | 2.95  |
| Elementary Occupations                       | 1.38                                          | 1.15   | 1.32  | 2.39     | 1.11   | 2.15  |
| Overall                                      | 2.14                                          | 1.93   | 2.09  | 3.35     | 2.00   | 3.15  |

Table S2 Number and proportion of missing values of variables by arm

| Variables                                            | Cytisine (n=1239)        |                              | Placebo (n=1233)         |                              |
|------------------------------------------------------|--------------------------|------------------------------|--------------------------|------------------------------|
|                                                      | Number of missing values | Proportion of missing values | Number of missing values | Proportion of missing values |
| Cost of behavioural support                          | 6                        | 0%                           | 7                        | 1%                           |
| Cost of TB treatment                                 | 102                      | 8%                           | 103                      | 8%                           |
| Cost of doctor visit at d0                           | 0                        | 0%                           | 1                        | 0%                           |
| Cost of doctor visit at m6                           | 61                       | 5%                           | 67                       | 5%                           |
| Cost of doctor visit at m12                          | 89                       | 7%                           | 76                       | 6%                           |
| Cost of hospital stay at d0                          | 2                        | 0%                           | 2                        | 0%                           |
| Cost of hospital stay at m6                          | 62                       | 5%                           | 67                       | 5%                           |
| Cost of hospital stay at m12                         | 89                       | 7%                           | 76                       | 6%                           |
| Cost of smoking cessation at d0                      | 0                        | 0%                           | 0                        | 0%                           |
| Cost of smoking cessation at m6                      | 63                       | 5%                           | 69                       | 6%                           |
| Cost of smoking cessation at m12                     | 103                      | 8%                           | 89                       | 7%                           |
| OOP on TB treatment at d0                            | 1                        | 0%                           | 0                        | 0%                           |
| OOP on TB treatment at m6                            | 63                       | 5%                           | 69                       | 6%                           |
| OOP on TB treatment at m12                           | 89                       | 7%                           | 77                       | 6%                           |
| OOP on smoking cessation at d0                       | 3                        | 0%                           | 3                        | 0%                           |
| OOP on smoking cessation at m6                       | 146                      | 12%                          | 153                      | 12%                          |
| OOP on smoking cessation at m12                      | 127                      | 10%                          | 118                      | 10%                          |
| OOP on doctor visit at d0                            | 6                        | 0%                           | 6                        | 0%                           |
| OOP on doctor visit at m6                            | 64                       | 5%                           | 75                       | 6%                           |
| OOP on doctor visit at m12                           | 89                       | 7%                           | 76                       | 6%                           |
| OOP on hospital stay at d0                           | 2                        | 0%                           | 2                        | 0%                           |
| OOP on hospital stay at m6                           | 64                       | 5%                           | 69                       | 6%                           |
| OOP on hospital stay at m12                          | 89                       | 7%                           | 76                       | 6%                           |
| OOP on tobacco products d0                           | 10                       | 1%                           | 9                        | 1%                           |
| OOP on tobacco products m6                           | 60                       | 5%                           | 67                       | 5%                           |
| OOP on tobacco products m12                          | 89                       | 7%                           | 76                       | 6%                           |
| Productivity loss of company for TB treatment at d0  | 7                        | 1%                           | 5                        | 0%                           |
| Productivity loss of company for TB treatment at m6  | 103                      | 8%                           | 106                      | 9%                           |
| Productivity loss of company for TB treatment at m12 | 92                       | 7%                           | 81                       | 7%                           |
| Productivity loss of company for doctor at d0        | 36                       | 3%                           | 37                       | 3%                           |
| Productivity loss of company for doctor at m6        | 111                      | 9%                           | 117                      | 9%                           |
| Productivity loss of company for doctor at m12       | 94                       | 8%                           | 82                       | 7%                           |
| Productivity loss of sick leave at d0                | 9                        | 1%                           | 6                        | 0%                           |
| Productivity loss of sick leave at m6                | 44                       | 4%                           | 62                       | 5%                           |

|                                        | Cytisine (n=1239)        |                              | Placebo (n=1233)         |                              |
|----------------------------------------|--------------------------|------------------------------|--------------------------|------------------------------|
| Variables                              | Number of missing values | Proportion of missing values | Number of missing values | Proportion of missing values |
| Productivity loss of sick leave at m12 | 75                       | 6%                           | 73                       | 6%                           |
| EQ-5D-5L at d0                         |                          |                              |                          |                              |
| 1 Mobility                             | 0                        | 0%                           | 0                        | 0%                           |
| 2 Self-care                            | 0                        | 0%                           | 2                        | 0%                           |
| 3 Usual activities                     | 2                        | 0%                           | 0                        | 0%                           |
| 4 Pain and discomfort                  | 1                        | 0%                           | 1                        | 0%                           |
| 5 Anxiety or depression                | 2                        | 0%                           | 1                        | 0%                           |
| EQ-5D-5L at m6                         |                          |                              |                          |                              |
| 1 Mobility                             | 60                       | 5%                           | 67                       | 5%                           |
| 2 Self-care                            | 60                       | 5%                           | 67                       | 5%                           |
| 3 Usual activities                     | 60                       | 5%                           | 68                       | 6%                           |
| 4 Pain and discomfort                  | 60                       | 5%                           | 68                       | 6%                           |
| 5 Anxiety or depression                | 60                       | 5%                           | 68                       | 6%                           |
| EQ-5D-5L at m12                        |                          |                              |                          |                              |
| 1 Mobility                             | 89                       | 7%                           | 76                       | 6%                           |
| 2 Self-care                            | 89                       | 7%                           | 78                       | 6%                           |
| 3 Usual activities                     | 89                       | 7%                           | 78                       | 6%                           |
| 4 Pain and discomfort                  | 90                       | 7%                           | 78                       | 6%                           |
| 5 Anxiety or depression                | 94                       | 8%                           | 78                       | 6%                           |
| VAS at d0                              | 0                        | 0%                           | 0                        | 0%                           |
| VAS at m6                              | 60                       | 5%                           | 68                       | 6%                           |
| VAS at m12                             | 89                       | 7%                           | 77                       | 6%                           |
| TB score at d0                         | 0                        | 0%                           | 0                        | 0%                           |
| TB score at m6                         | 60                       | 5%                           | 66                       | 5%                           |

Table S3 Logistic regression for missingness of costs, OOPs, productivity loss and outcomes on arm and baseline covariates

| Missing on:                                          | Allocation       | Age                      | Country                  |
|------------------------------------------------------|------------------|--------------------------|--------------------------|
| Cost of TB treatment                                 | 1.02 (0.76-1.35) | 1.02 (1.01-1.03)         | <b>0.26 (0.19-0.36)*</b> |
| Cost of doctor visit at m6                           | 1.07 (0.75-1.53) | 1.00 (0.99-1.01)         | <b>0.15 (0.10-0.24)*</b> |
| Cost of doctor visit at m12                          | 0.83 (0.61-1.14) | 1.00 (0.99-1.01)         | <b>0.17 (0.12-0.25)*</b> |
| Cost of hospital stay at m6                          | 1.05 (0.74-1.50) | 1.00 (0.99-1.01)         | <b>0.16 (0.11-0.24)*</b> |
| Cost of hospital stay at m12                         | 0.83 (0.61-1.14) | 1.00 (0.99-1.01)         | <b>0.17 (0.12-0.25)*</b> |
| Cost of smoking cessation at m6                      | 1.07 (0.76-1.52) | 1.00 (0.99-1.01)         | <b>0.17 (0.11-0.26)*</b> |
| Cost of smoking cessation at m12                     | 0.84 (0.63-1.13) | 1.00 (0.99-1.01)         | <b>0.28 (0.21-0.39)*</b> |
| OOP on TB treatment at m6                            | 1.07 (0.76-1.52) | 1.00 (0.99-1.01)         | <b>0.16 (0.10-0.24)*</b> |
| OOP on TB treatment at m12                           | 0.84 (0.62-1.15) | 1.00 (0.99-1.01)         | <b>0.17 (0.12-0.25)*</b> |
| OOP on smoking cessation at m6                       | 1.04 (0.82-1.33) | <b>0.99 (0.98-1.00)*</b> | 1.14 (0.89-1.47)         |
| OOP on smoking cessation at m12                      | 0.91 (0.70-1.18) | 0.99 (0.98-1.00)         | <b>0.52 (0.40-0.68)*</b> |
| OOP on doctor visit at m6                            | 1.15 (0.82-1.62) | 1.00 (0.99-1.01)         | <b>0.16 (0.10-0.24)*</b> |
| OOP on doctor visit at m12                           | 0.83 (0.61-1.14) | 1.00 (0.99-1.01)         | <b>0.17 (0.12-0.25)*</b> |
| OOP on hospital stay at m6                           | 1.05 (0.74-1.49) | 1.00(0.99-1.01)          | <b>0.16 (0.11-0.24)*</b> |
| OOP on hospital stay at m12                          | 0.83 (0.61-1.14) | 1.00 (0.99-1.01)         | <b>0.17 (0.12-0.25)*</b> |
| OOP on tobacco products m6                           | 1.09 (0.76-1.55) | 1.00 (0.99-1.01)         | <b>0.16 (0.10-0.24)*</b> |
| OOP on tobacco products m12                          | 0.83 (0.61-1.14) | 1.00 (0.99-1.01)         | <b>0.17 (0.12-0.25)*</b> |
| Productivity loss of company for TB treatment at m6  | 1.01 (0.77-1.35) | 0.99 (0.98-1.00)         | <b>0.55 (0.41-0.73)*</b> |
| Productivity loss of company for TB treatment at m12 | 0.86 (0.63-1.16) | 1.00 (0.99-1.01)         | <b>0.18 (0.13-0.26)*</b> |
| Productivity loss of company for doctor at m6        | 1.04 (0.80-1.37) | 0.99 (0.98-1.00)         | <b>0.52 (0.40-0.69)*</b> |
| Productivity loss of company for doctor at m12       | 0.85 (0.63-1.15) | 1.00 (0.99-1.01)         | <b>0.18 (0.12-0.25)*</b> |
| Productivity loss of sick leave at m6                | 1.40 (0.95-2.08) | 0.99 (0.97-1.00)         | <b>0.22 (0.14-0.33)*</b> |
| Productivity loss of sick leave at m12               | 0.95 (0.68-1.32) | 0.99 (0.98-1.00)         | <b>0.27 (0.19-0.38)*</b> |
| EQ-5D-5L at m6                                       | 1.09 (0.76-1.55) | 1.00 (0.99-1.01)         | <b>0.16 (0.10-0.24)*</b> |
| EQ-5D-5L at m12                                      | 0.83 (0.61-1.14) | 1.00 (0.99-1.01)         | <b>0.17 (0.12-0.25)*</b> |
| TB score at m6                                       | 1.02 (0.72-1.44) | 1.00 (0.99-1.01)         | <b>0.18 (0.12-0.26)*</b> |

\*P&lt;0.05

## References

1. Bangladesh Bureau of Statistics. Report on Labour Force Survey (LFS) 2016-17, 2018.
2. Pakistan Bureau of Statistics. Labour Force Survey 2017-18, 2018.
3. The World Bank. DataBank World Development Indicators, 2019.
